# Supplementary material for: Skin layer-specific spatiotemporal assessment of micrometabolism during wound angiogenesis
Source: PubMed Central journal article supplement (PMC11662067; doi:10.1038/s42003-024-07257-4), 2024-12-20
Supplement: 42003_2024_7257_MOESM2_ESM.pdf [file 42003_2024_7257_MOESM2_ESM.pdf]

# 1 Description of Additional Supplementary 2 Files

3

4 **File name:** Supplementary Data

5 **Description:** The source data behind the graphs in the paper.

6
